# Supplementary material for: Template-free synthesis of mesoporous Co3O4 with controlled morphologies for lithium ion batteries
Source: Royal Society of Chemistry journal article supplement (doi:10.1039/c3ra40333e), 2013-01-01
Supplement: c3ra40333e.pdf [file c3ra40333e.pdf]

## Supporting Information

### Template-Free Synthesis of Mesoporous $\text{Co}_3\text{O}_4$ with Controlled Morphologies for Lithium Ion Batteries

Shao-Wei Bian\* and Lei Zhu

*College of Chemistry, Chemical Engineering and Biotechnology, Donghua University, Shanghai 201620, PR China.*

*E-mail : swbian@dhu.edu.cn*

#### Experimental Section

**Sample preparation:** For preparing  $\text{CoCO}_3$  microspheres, 0.25 g of  $\text{CoCl}_2 \cdot 6\text{H}_2\text{O}$  was added into a solution of 5 mL  $\text{H}_2\text{O}$ , 15 mL glycerol and 0.5 g urea at room temperature under stirring. After 1h, this solution was transformed into a Teflon-lined stainless steel autoclave and maintained at 180 °C for 12 h. After the sample was cooled to ambient temperature, the precipitates were collected after being rinsed with pure ethanol and water repeatedly and dried in vacuum at 80 °C. For preparing  $\text{CoCO}_3$  microcubes, the volume ratio of  $\text{H}_2\text{O}$  and glycerol is 1:1.

**Characterization:** The microscopic features of the samples were characterized by scanning electron microscopy (SEM, JEOL-6701F) and transmission electron microscopy (TEM, JEOL JEM-2010). The powder X-ray diffraction pattern was collected using a Panalytica X'pert PRO diffractometer. The TGA measurement was carried out under air at a heating rate of 2 °C  $\text{min}^{-1}$  using a TQ500 instrument. Nitrogen adsorption/desorption isotherms were measured at -196 °C using a Micromeritics ASAP 2020 system.

**Electrochemical Measurements:** The active material (70 wt.%), carbon black (20 wt.%), and poly(vinylidene fluoride) binder (10 wt.%) in N-methylpyrrolidone were mixed into a homogeneous slurry. The obtained slurry was pasted on copper foil and then dried in a vacuum oven at 80 °C for 12 h. Electrochemical test cells were assembled in an argon-filled glove box. Lithium foil was used as the counter electrode. A solution of LiPF<sub>6</sub> in a 1:1 vol/vol mixture of ethylene carbonate and diethyl carbonate was used as the electrolyte. Celgard 2400 film was used as separator. The cells were charged and discharged galvanostatically in a voltage range of 0.005 and 3.0 V using a Neware battery tester.

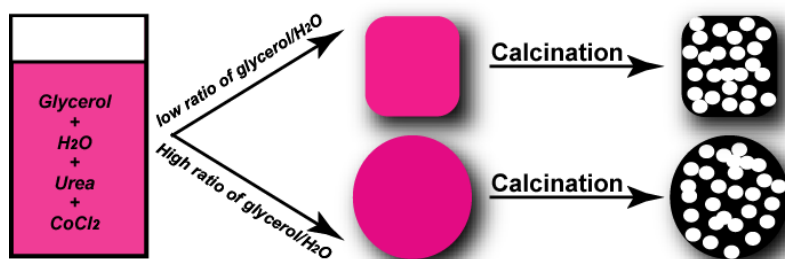

**Scheme 1** Schematic of preparation of mesoporous Co<sub>3</sub>O<sub>4</sub> microspheres and microcubes.

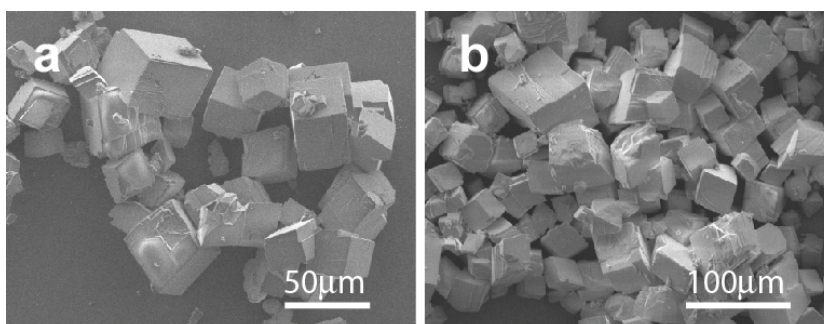

**Fig. S1** SEM images of CoCO<sub>3</sub> synthesized at a ratio of H<sub>2</sub>O and glycerol (volume:volume): (a) 20:0 (b) 15:5.

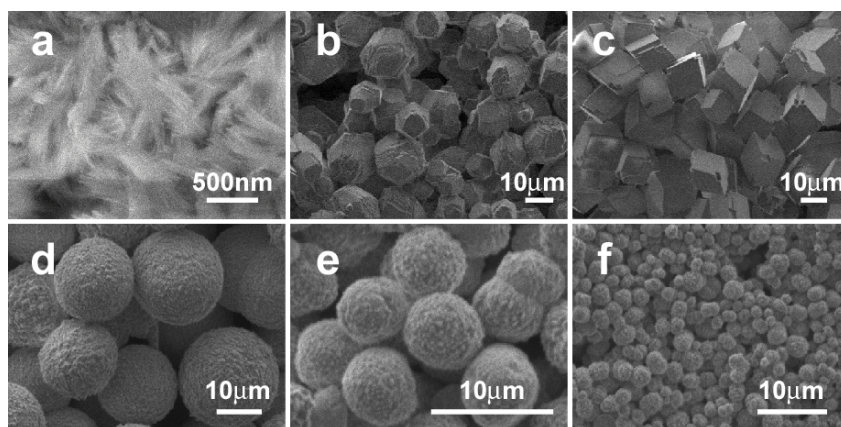

**Fig. S2** Effect of the urea concentration on the morphologies of  $\text{CoCO}_3$  (a, b and c) microcubes and (d, e and f) microspheres: 0.1, 0.2 and 1g urea.

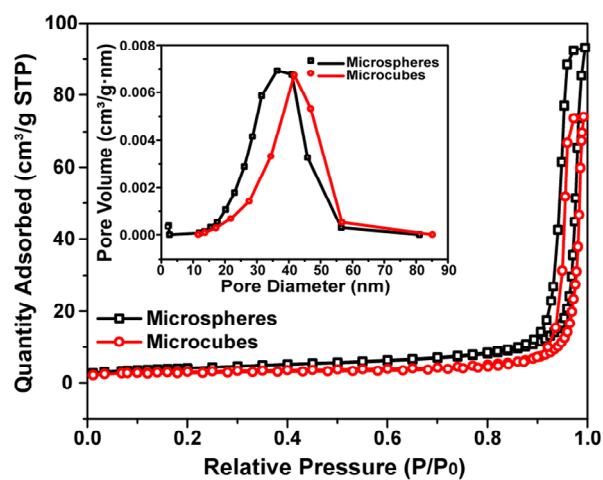

**Fig. S3** Nitrogen adsorption/desorption isotherms of mesoporous  $\text{Co}_3\text{O}_4$  microspheres and microcubes. The inset is BJH pore size distribution.

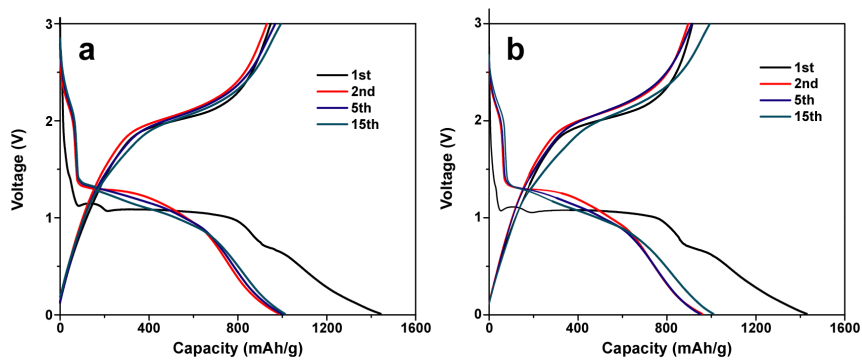

**Fig. S4** Discharge-charge profiles of mesoporous  $\text{Co}_3\text{O}_4$  (a) microspheres and (b) microcubes.
